# Supplementary material
Source: PubMed Central journal article supplement (PMC1483218)

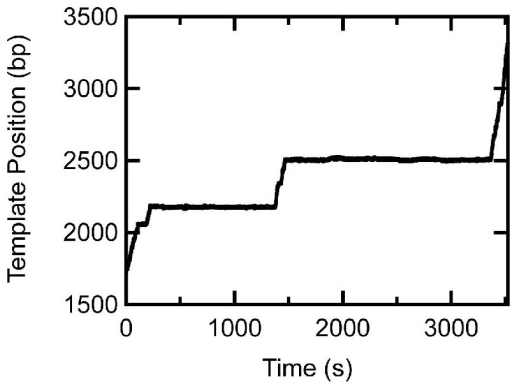

Supplement: NIHMS10843-supplement-s1.pdf [file NIHMS10843-supplement-s1.pdf]

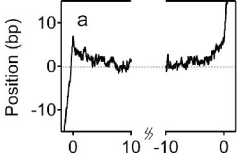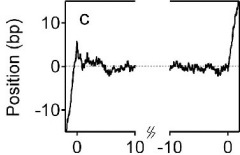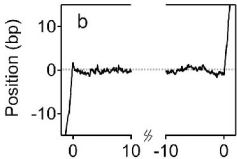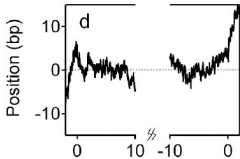

Time (s)

Time (s)

Supplement: NIHMS10843-supplement-s2.pdf [file NIHMS10843-supplement-s2.pdf]
